1 Enhancement of the Activity of the Antimicrobial Peptides HNP1 and LL-37 by Bovine  
2 Pancreatic Ribonuclease A

3 Bryan Ericksen

4 University of Maryland School of Medicine Institute of Human Virology, Baltimore,  
5 Maryland

6

7 Abstract

8 Background: HNP1, LL-37, and HBD1 are antimicrobial against *Escherichia coli* ATCC  
9 25922 at the standard inoculum but less active at higher inocula.

10 Methods: The virtual colony count (VCC) microbiological assay was adapted for high  
11 inocula and the addition of yeast tRNA and bovine pancreatic ribonuclease A (RNase).  
12 96-well plates were read for 12 hours in a Tecan Infinite M1000 plate reader and  
13 photographed under 10x magnification.

14 Results: Adding tRNA 1:1 to HNP1 at the standard inoculum almost completely  
15 abrogated activity. Adding RNase 1:1 to HNP1 at the standard inoculum of  $5 \times 10^5$   
16 CFU/mL did not enhance activity. Increasing the inoculum to  $6.25 \times 10^7$  CFU/mL almost  
17 abrogated HNP1 activity. However, adding RNase 25:1 to HNP1 enhanced activity.  
18 Adding both tRNA and RNase resulted in enhanced activity, indicating that the  
19 enhancement effect of RNase overwhelms the inhibiting effect of tRNA when both are  
20 present. HBD1 activity at the standard inoculum was almost completely abrogated by  
21 the addition of tRNA, but LL-37 activity was only slightly inhibited by tRNA. At the high  
22 inoculum, LL-37 activity was enhanced by RNase. HBD1 activity was not enhanced by  
23 RNase. RNase was not antimicrobial in the absence of antimicrobial peptides. Cell  
24 clumps were observed at the high inoculum in the presence of all three antimicrobial  
25 peptides and at the standard inoculum in the presence of HNP1+tRNA.

26 Conclusions: Antimicrobial peptide-ribonuclease combinations have the potential to be  
27 active against high cell concentrations and biofilms, conditions where the antimicrobial  
28 agent alone is relatively ineffective.

29

30 Introduction

31

32           Although cationic antimicrobial peptides (CAPs) have been studied as possible  
33 therapeutic agents for many years, few have survived clinical trials to become useful  
34 antibiotics. (Mishra 2017) Three CAPs are representative of three different structural  
35 classes that contribute to the human innate immune system: human neutrophil peptide  
36 1 (HNP1), an alpha defensin; human beta defensin 1 (HBD1); and the human cathelicidin  
37 LL-37. (De Smet 2005) One reason why CAP drug candidates have failed to gain  
38 approval is a lack of efficacy. (Magana 2020) I demonstrated a pronounced inoculum  
39 effect when the defensin HNP1 was assayed against high inocula of *Escherichia coli*  
40 ATCC 25922, such that the antimicrobial peptide almost completely lost activity under  
41 those conditions. (Ericksen 2020) A pronounced inoculum effect was also observed  
42 when HNP1 was assayed against *Staphylococcus aureus* ATCC 29213 and *Bacillus cereus*  
43 ATCC 10876. What might cause this decrease in efficacy at high cell concentrations?  
44 The molecular basis of the inoculum effect is unclear. However, one possibility is that  
45 bacterial cells produce defensin inhibitors that are at a higher concentration when there  
46 are more cells present.

47           One possible type of inhibition is that polyanions might bind and inhibit CAPs by  
48 electrostatic attraction. Here I hypothesize that the polyanion tRNA might inhibit CAPs,  
49 that inhibition by RNA is partially responsible for the inoculum effect, and that the  
50 addition of ribonuclease could enhance antimicrobial peptide activity, restoring some of  
51 the efficacy lost at high cell concentrations.

52

## 53   Methods

54

55           The VCC assay was adapted for high inocula as previously described (Ericksen  
56 2020), and volumes were adjusted to allow for the addition of yeast tRNA (Sigma from  
57 *Saccharomyces cerevisiae*) and/or bovine pancreatic ribonuclease (Roche or Macherey-  
58 Nagel (MN)). HNP1, LL-37 and HBD1 were synthesized ABI 433A synthesizer using an  
59 optimized HBTU activation/DIEA in situ neutralization protocol developed by Kent and  
60 coworkers for Boc chemistry solid phase peptide synthesis as previously described.  
61 (Zhao 2013)(Pazgier 2013)(Bharucha 2021) Two inocula were studied: the standard  
62 inoculum of  $5 \times 10^5$  CFU/mL, with cells from a seed culture diluted in 10 mM sodium  
63 phosphate pH 7.4, and a high inoculum of  $6.25 \times 10^7$  CFU/mL, equivalent to adding  
64 undiluted seed culture. Antimicrobial peptides were incubated in 10 mM sodium  
65 phosphate pH 7.4 plus 1% tryptic soy broth (TSB) for two hours at 37°C shaking every 5  
66 minutes for 3 seconds in a Tecan Infinite M1000 plate reader. An equal volume of

67 twice-concentrated Mueller Hinton Broth was then added and 96-well plates were read  
68 for 12 hours in the plate reader and then some wells containing cell clumps were  
69 photographed under 10x magnification. In one experiment, the concentration of TSB  
70 present in phosphate buffer was adjusted.

71

## 72 Results

73

74 Adding tRNA 1:1 to HNP1 at the standard inoculum almost completely abrogated  
75 activity (Figure 1). Adding Roche RNase 1:1 to HNP1 at the standard inoculum of  $5 \times 10^5$   
76 CFU/mL did not enhance activity. Increasing the inoculum to  $6.25 \times 10^7$  CFU/mL almost  
77 abrogated HNP1 activity. (Figure 2) However, adding RNase 25:1 to HNP1 enhanced  
78 activity at the high inoculum. Adding both tRNA and RNase resulted in enhanced  
79 activity, indicating that the enhancement effect of RNase overwhelms the inhibiting  
80 effect of tRNA when both are present. HBD1 activity at the standard inoculum was  
81 almost completely abrogated by the addition of tRNA, but LL-37 activity was only  
82 slightly inhibited by tRNA. (Figure 3) At the high inoculum, LL-37 was enhanced, but  
83 LL-37 showed greater activity than HNP1 in the absence of RNase. (Figure 4) HBD1  
84 activity was not enhanced by RNase. RNase was not active in the absence of  
85 antimicrobial peptides. The observations with HNP1 at the high inoculum were  
86 repeated using a second RNase manufacturer, Macherey-Nagel. (Figure 5) The  
87 experiment with MN RNase was repeated. (Figure 6) 1% TSB was used in most assays,  
88 but the %TSB was varied in one experiment, resulting in maximum activity at 4% TSB  
89 with either 5x or 25x MN RNase added. (Figure 7) Cell clumps were observed at the  
90 high inoculum in the presence of all three antimicrobial peptides with or without RNase  
91 and at the standard inoculum in the presence of HNP1+tRNA. (Figure 8) The VCC assays  
92 were conducted with TSB added to the 10 mM sodium phosphate incubation buffer. The  
93 enhancement of activity caused by RNase was observed with LL-37 but not HNP1 when  
94 washed cells were used, indicating that RNase operates by different mechanisms with  
95 the two antimicrobial peptides. Although biofilm formation was not directly assayed, it  
96 is assumed that the cell clumps photographed at 10x magnification are biofilms.  
97 Ribonuclease did not enhance HBD1 activity at the  $6.25 \times 10^7$  CFU/mL inoculum,  
98 demonstrating a strong inoculum effect with HBD1 vs. *E. coli*. LL-37 had a much lesser  
99 inoculum effect against *E. coli*. The effect of ribonuclease on HNP1 is strongest with  
100 lowest amounts of TSB present in the phosphate buffer during the 2 hour incubation.  
101 The ability of tRNA to abrogate HNP1 and HBD1 activity, and the failure of tRNA to

102 affect LL-37 activity, at the standard inoculum cannot be explained by net charge.  
103 Possibly, hydrophobic interactions play a role in tRNA binding and inhibition. It is also  
104 possible that tRNA inducing biofilm formation impacts HNP1 and HBD1 more than LL-  
105 37.

106

## 107 Conclusions

108

109 Antimicrobial assays are ordinarily conducted using a single antimicrobial agent,  
110 studying its effect in isolation. However, the experiments presented here may offer a  
111 glimpse into a more realistic in vivo scenario, in which multiple antimicrobial agents  
112 work in concert against infection. Eight RNases are encoded by the human genome,  
113 many of which have potent antimicrobial activity, such as RNase 7 expressed in  
114 epithelial cells. (Sorrentino 2010) Bovine pancreatic RNase A, on the other hand, has a  
115 digestive function degrading RNA and an antimicrobial function has not normally been  
116 ascribed to it. RNase A is a basic protein (pI = 9.63). It is unknown whether the RNA-  
117 degrading activity of RNase or its cationicity is responsible for the enhancement of  
118 HNP1 and LL-37 activity. Product literature suggests assaying RNase A using 100 mM  
119 Tris buffer, pH 7.4. Enzymatic activity in 10 mM sodium phosphate buffer was not  
120 tested, but RNase A is very stable with four disulfide bonds.

121 The variation in the amount of TSB present in 10 mM phosphate buffer revealed  
122 that the increase in activity caused by a small amount of nutrients present, allowing  
123 some growth during the two-hour incubation, is counterbalanced by the inhibition of  
124 defensin activity at higher TSB concentrations, presumably by the salt content of TSB.  
125 This same effect is probably partially responsible for the almost complete abrogation of  
126 activity of HNP1 when undiluted seed culture is added to the 96-well plate at the high  
127 inoculum in the absence of RNase, since the salt concentration is much higher than in  
128 assays at the standard inoculum where the seed culture is diluted in 10 mM sodium  
129 phosphate buffer before adding to the 96-well plate.

130 The vast majority of published VCC assays were conducted at the standard  
131 inoculum, reflecting a general reliance on the standard inoculum in a wide range of  
132 published antimicrobial assays. Under these conditions, cells are predominantly  
133 planktonic. However, a high inoculum may be more medically relevant, since high cell  
134 concentrations and biofilms can accompany acute infections. This study demonstrates  
135 the utility of conducting assays at a high inoculum, revealing details of antimicrobial

136 activity that would be missed if the antimicrobial agents were studied only at the  
137 standard inoculum. Further studies using animal models are necessary to determine  
138 whether the enhancement of activity observed at the high inoculum is sufficient to  
139 enable the infected host to overcome bacterial infections.

140 It should be emphasized that both RNA and ribonucleases are ubiquitous in vivo.  
141 Therefore, these experiments may be more biologically relevant than VCC experiments  
142 lacking RNA or ribonuclease. There are several possible sources of bacterial RNA that  
143 might be present at the site of a bacterial infection. Firstly, bacteria normally secrete  
144 RNA during their growth, which may have a role in the extracellular matrix of biofilms.  
145 (Ozoline 2019) The results of the experiments presented here suggest that this secreted  
146 RNA may also be a bacterial defense mechanism against antimicrobial peptides.  
147 Secondly, once antimicrobial peptides are released at the infection site, cell lysis may  
148 result in the release of intracellular RNAs, including mRNA and tRNA. Thirdly, host RNA  
149 may be present. Therefore, inhibition by RNA must be regarded as a common obstacle  
150 to effective antimicrobial activity that frequently occurs in real world scenarios.

151 The combination of an antimicrobial peptide with a ribonuclease could be  
152 regarded as a novel invention that could possibly be used as a therapy to treat bacterial  
153 infections. LL-37 and RNase 1 have been shown to act synergistically to kill *E. coli*. (Eller  
154 2020) RNases have been tested in clinical trials as chemotherapeutics for the treatment  
155 of cancer. (Ardelt 2009)

156 Further studies are warranted to determine whether these results could be  
157 generalized to antimicrobial peptide-nuclease combinations, as might be suggested by  
158 the presence of DNA in biofilms. A combination of an antimicrobial peptide with both  
159 deoxyribonuclease (DNase) and RNase might be expected to be more potent than the  
160 combination of the antimicrobial peptide and RNase in the absence of DNase, because  
161 DNA is considered a more prevalent structural component of biofilms than RNA. (Gilan  
162 2013) DNase is an approved drug, dornase alfa (Pulmozyme), which cuts apart  
163 extracellular DNA in the lungs of cystic fibrosis patients, making the mucus thinner and  
164 easier to expel. (Wagener 2012) It is possible that DNase in combination with an  
165 antimicrobial peptide and RNase would form an effective treatment against acute  
166 bacterial infections. A new generation of antimicrobial peptide-nuclease combinations  
167 would offer a new hope that peptides that are sometimes defeated by the resistance  
168 mechanism of biofilm formation can be repurposed to degrade biofilms instead, with  
169 increased activity to fight infections.

170

171 Acknowledgments

172

173 I thank Robert I. Lehrer for sharing an unpublished manuscript proposing that defensins  
174 are inhibited by RNA, Wuyuan Lu for providing antimicrobial peptides and helpful  
175 discussions, and Peprotech, Inc. for funding.

176

177 References

178 Ardelt W, Ardelt B, Darzynkiewicz Z. Ribonucleases as potential modalities in anticancer  
179 therapy. *European Journal of Pharmacology* 2009 625(1-3): 181-189.

180 Bharucha JP, Sun L, Lu W, Gartner S, Garzino-Demo A. Human beta-defensin 2 and 3  
181 Inhibit HIV-1 replication in macrophages. *Front Cell Infect Microbiol* 2021 11: 535352.

182 De Smet K, Contreras R. Human antimicrobial peptides: defensins, cathelicidins and  
183 histatins. *Biotechnology Letters* 2005 27(18):1337-1347.

184 Eller CH, Raines RT. Antimicrobial synergy of a ribonuclease and a peptide secreted by  
185 human cells. *ACS Infectious Diseases* 2020 6(11):3083-3088.

186 Ericksen B. Virtual colony count. *Wikijournal of Science* 2020 3(1):3.

187 Gilan I, Sivan A. Extracellular DNA plays an important structural role in the biofilm of the  
188 plastic degrading actinomycete *Rhodococcus ruber*. *Advances in Microbiology* 2013 3(8):  
189 40674

190 Magana M, Pushpanathan M, Santos AL, Leanse L, Fernandez M, Ioannidis A, Giulianotti  
191 MA, Apidianakis Y, Bradfute S, Ferguson AL, Cherkasov A, Seleem MN, Pinilla C, de la  
192 Fuente-Nunez C, Lazaridis T, Dai T, Houghten RA, Hancock REW, Tegos GP. The value of  
193 antimicrobial peptides in the age of resistance. *The Lancet Infectious Diseases* 2020  
194 20(9): e216-e230.

195 Mishra B, Reiling S, Zarena D, Wang G. Host defense antimicrobial peptides as  
196 antibiotics: design and application strategies. *Current Opinion in Chemical Biology* 2017  
197 38: 87-96.

198 Ozoline O, Jass J. Editorial: secretion and signalling of bacterial RNAs. *FEMS*  
199 *Microbiology Letters* 2019 366(1):fny281.

200 Pazgier M, Ericksen B, Ling M, Toth E, Shi J, Li X, Galliher-Beckley A, Lan L, Zou G, Zhan C,  
201 Yuan W, Pozharski E, Lu W. Structural and functional analysis of the pro-domain of  
202 human cathelicidin, LL-37. *Biochemistry* 2013 52(9):1547-58.

203 Sorrentino S. The eight human "canonical" ribonucleases: Molecular diversity, catalytic  
204 properties, and special biological actions of the enzyme proteins. *FEBS Letters* 2010 584:  
205 2194-2200.

206 Wagener JS, Kupfer O. Dornase alfa (Pulmozyme). *Current Opinion in Pulmonary*  
207 *Medicine* 2012 18(6):609-614.

208 Zhao L, Tolbert WD, Ericksen B, Zhan C, Wu X, Yuan W, Li X, Pazgier M, Lu W. Single,  
209 double and quadruple alanine substitutions at oligomeric interfaces identify  
210 hydrophobicity as the key determinant of human neutrophil alpha defensin HNP1  
211 function. *PLoS One*. 2013 8(11):e78937.

212

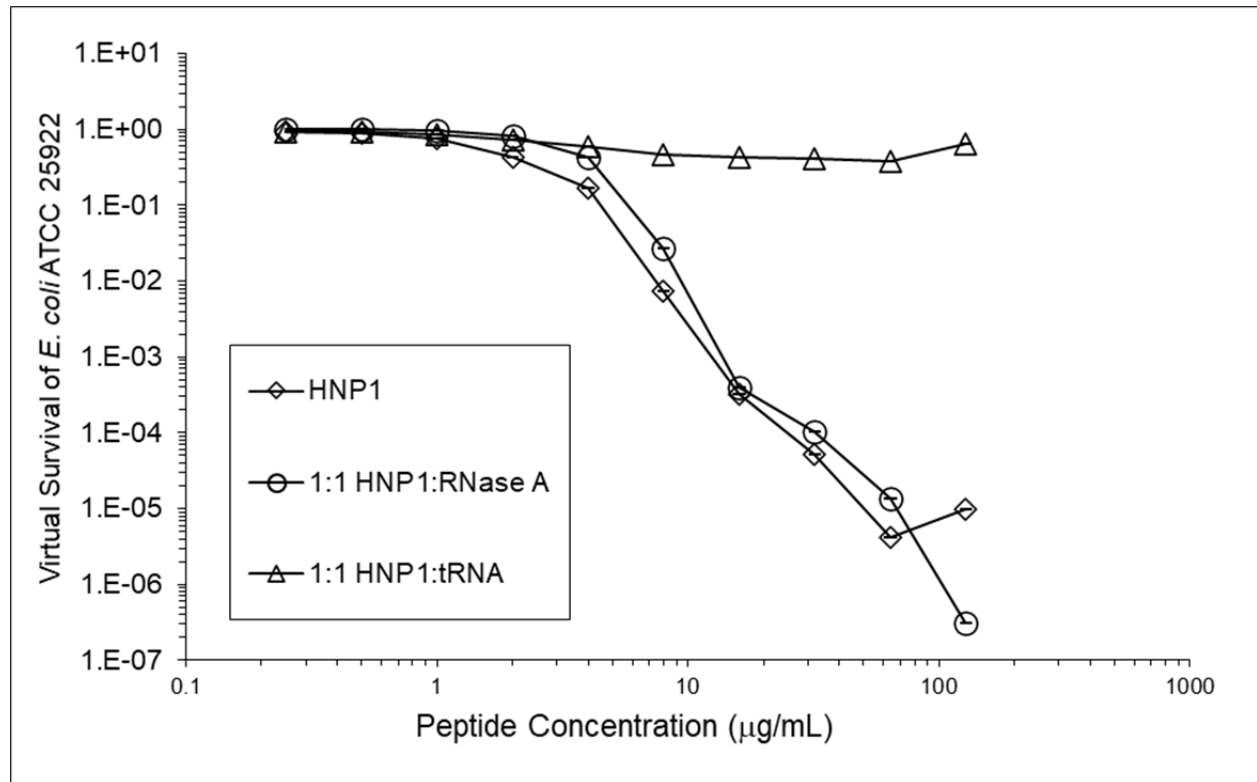

213

214 Figure 1. Activity of HNP1 with or without tRNA and RNase at the standard inoculum.

215

216



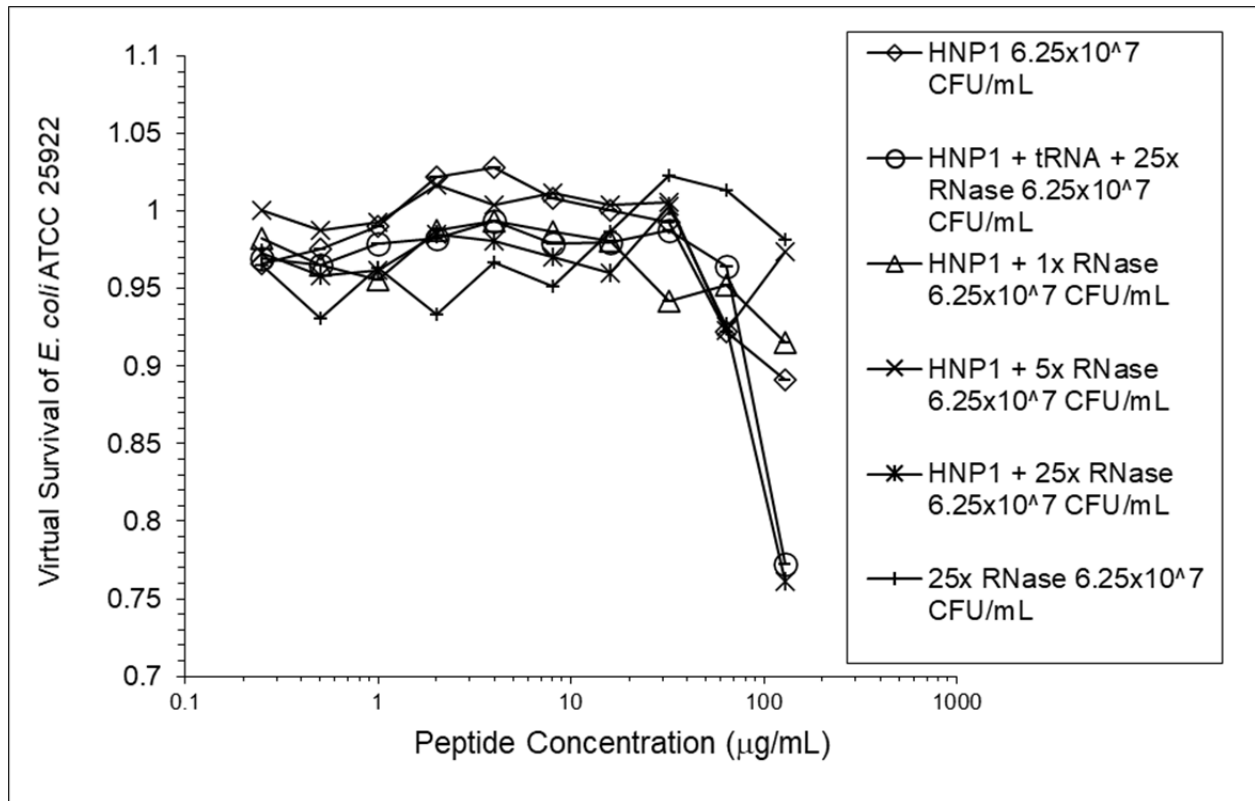

217

218 Figure 2. Activity of HNP1 at the high inoculum with or without tRNA and three  
219 concentrations of RNase. Activity with HNP1 and both tRNA and the highest  
220 concentration of RNase was essentially the same as HNP1 plus RNase alone, indicating  
221 the enhancement of activity overcomes inhibition by tRNA. RNase in the absence of  
222 antimicrobial peptides was not antimicrobial.

223

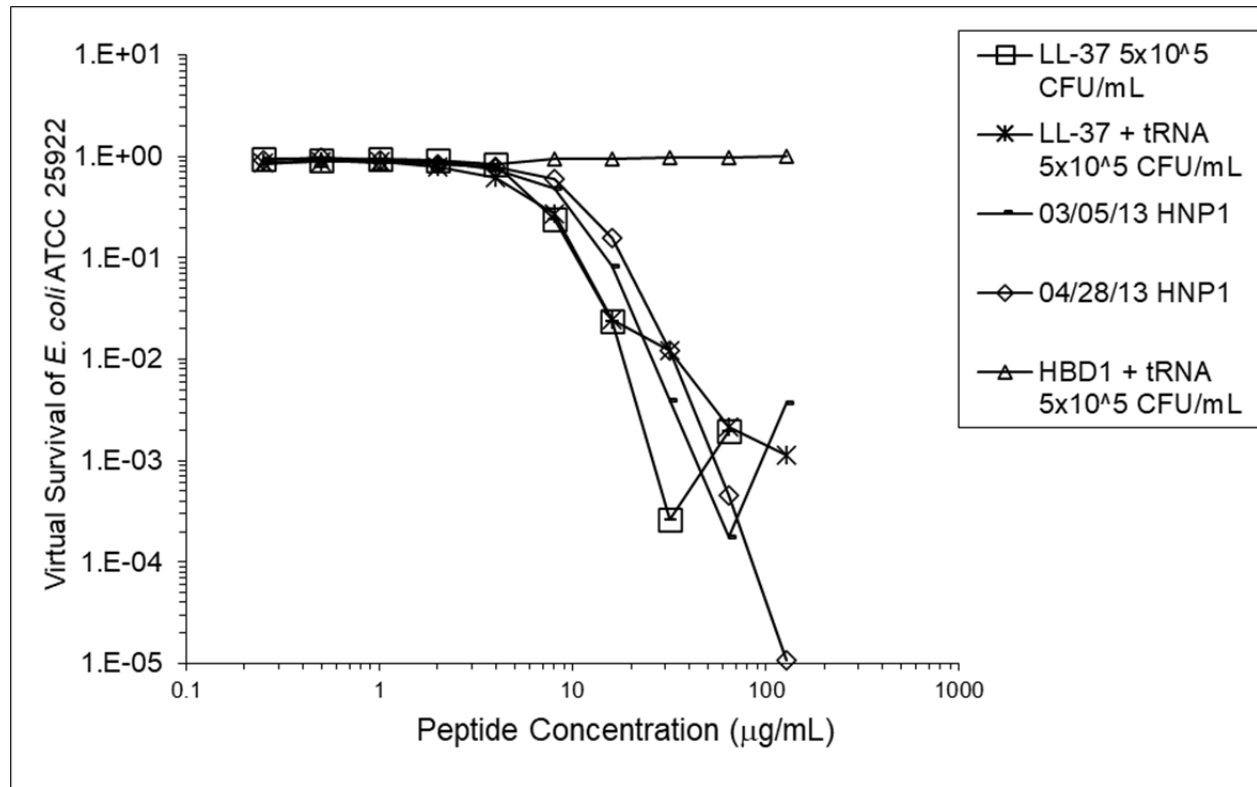

224

225 Figure 3. LL-37 was assayed at the standard inoculum with or without tRNA. HBD1 was  
226 assayed at the standard inoculum in the presence of 1:1 tRNA. Two preparations of  
227 HNP1 were assayed in the absence of tRNA as positive controls.

228

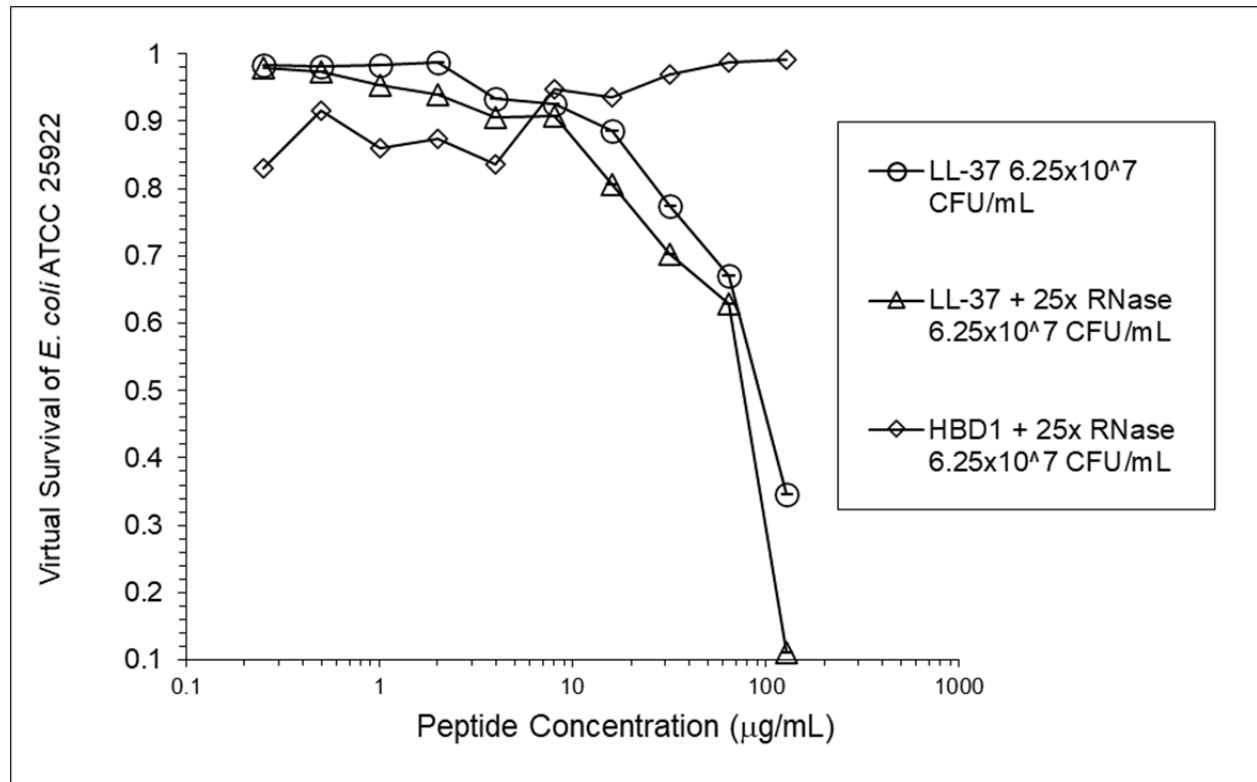

229

230

231 Figure 4. LL-37 was assayed at the high inoculum with or without RNase. HBD1 was

232 assayed at the high inoculum with RNase.

233

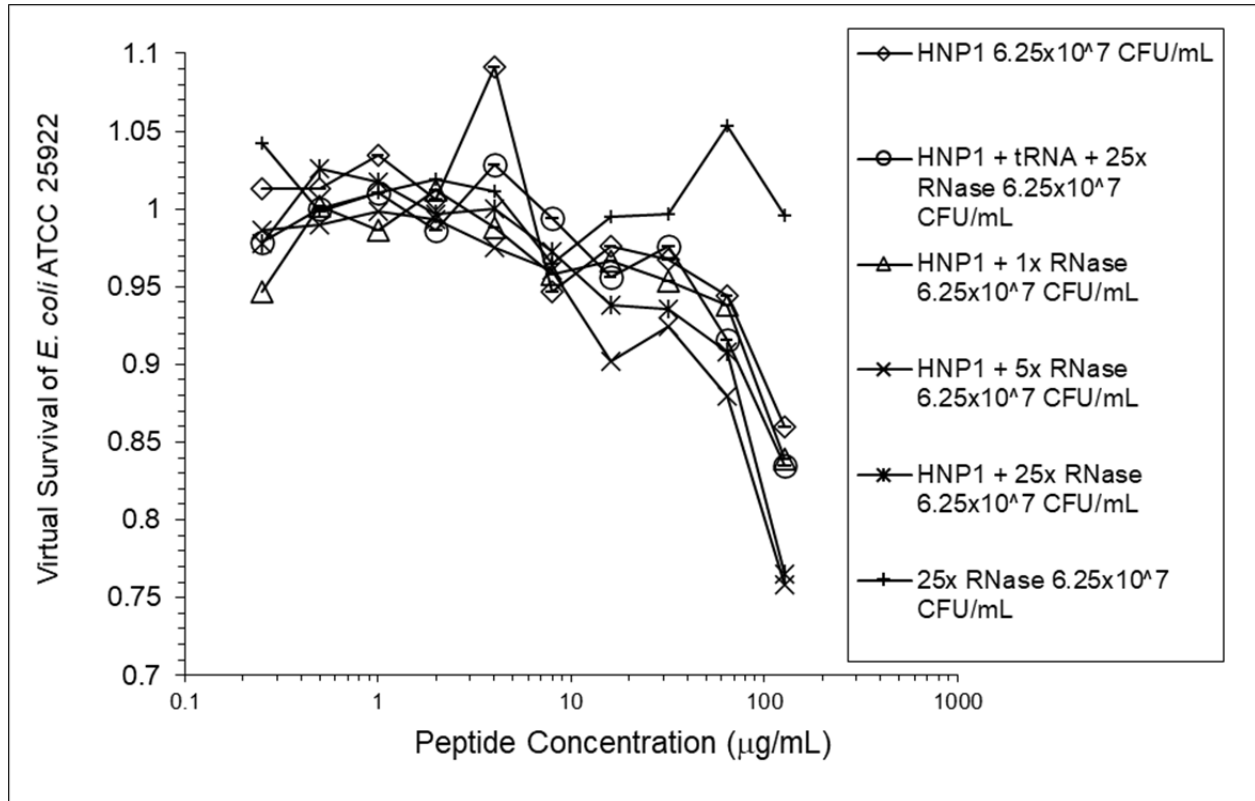

234

235 Figure 5. HNP1 was assayed at the high inoculum in the presence and absence of  
236 RNase from a second manufacturer, and in the presence of both tRNA and RNase.

237

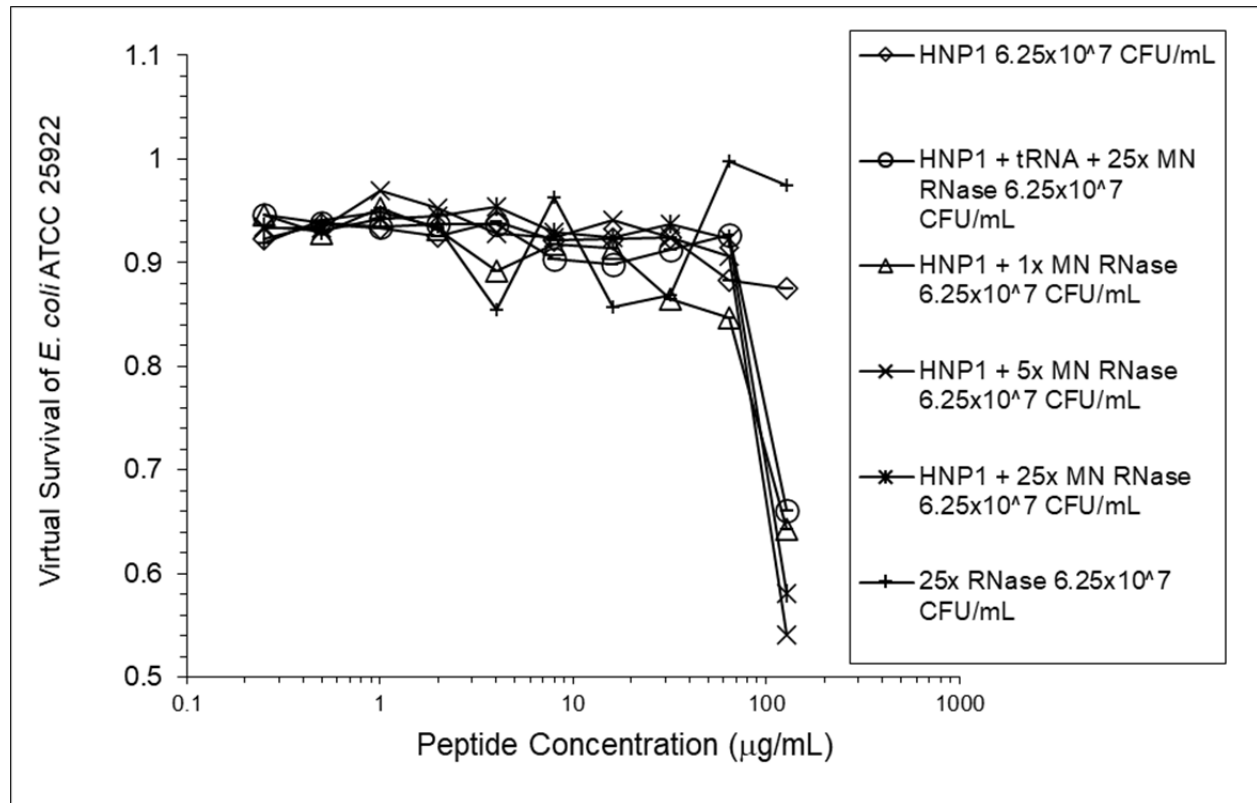

238

239 Figure 6. The assay shown in Figure 5 was repeated.

240

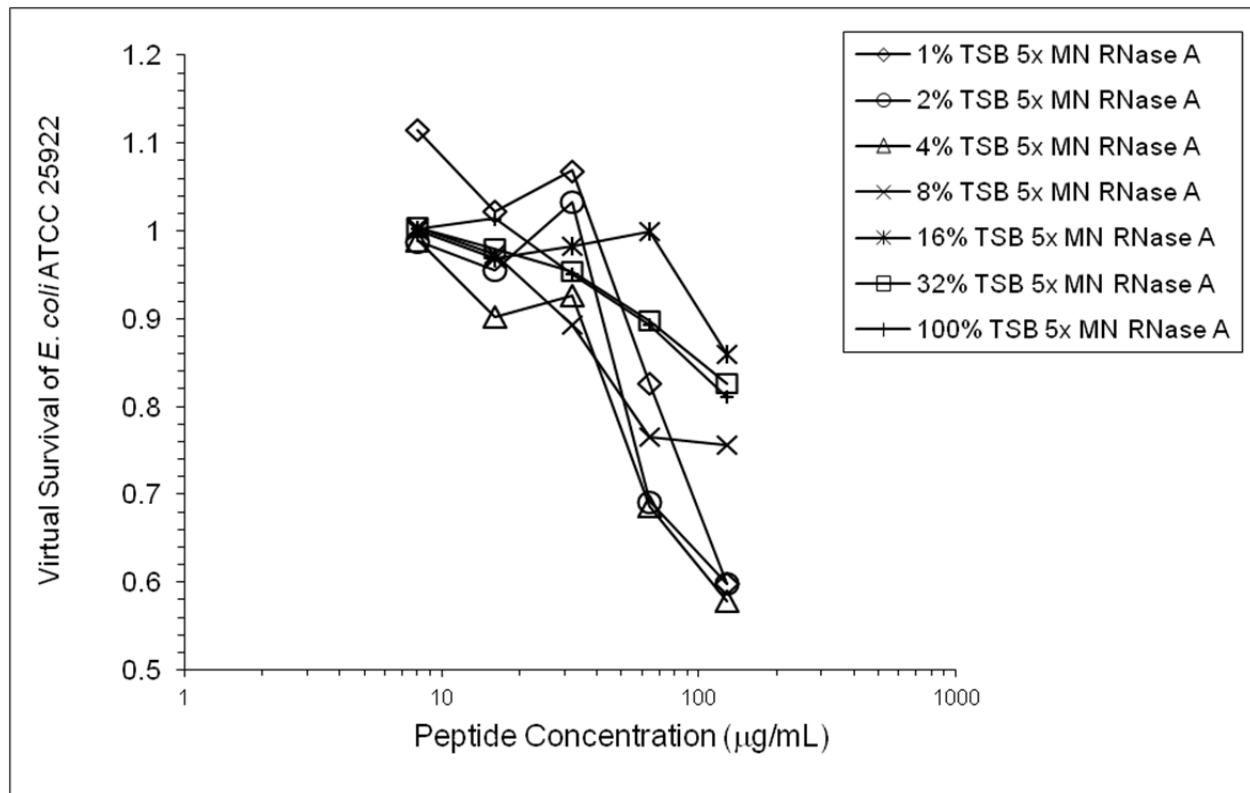

241

242 Figure 7. HNP1 was assayed at the high inoculum with variation in the amount of TSB  
243 present during the two-hour incubation in 10 mM sodium phosphate buffer.

244

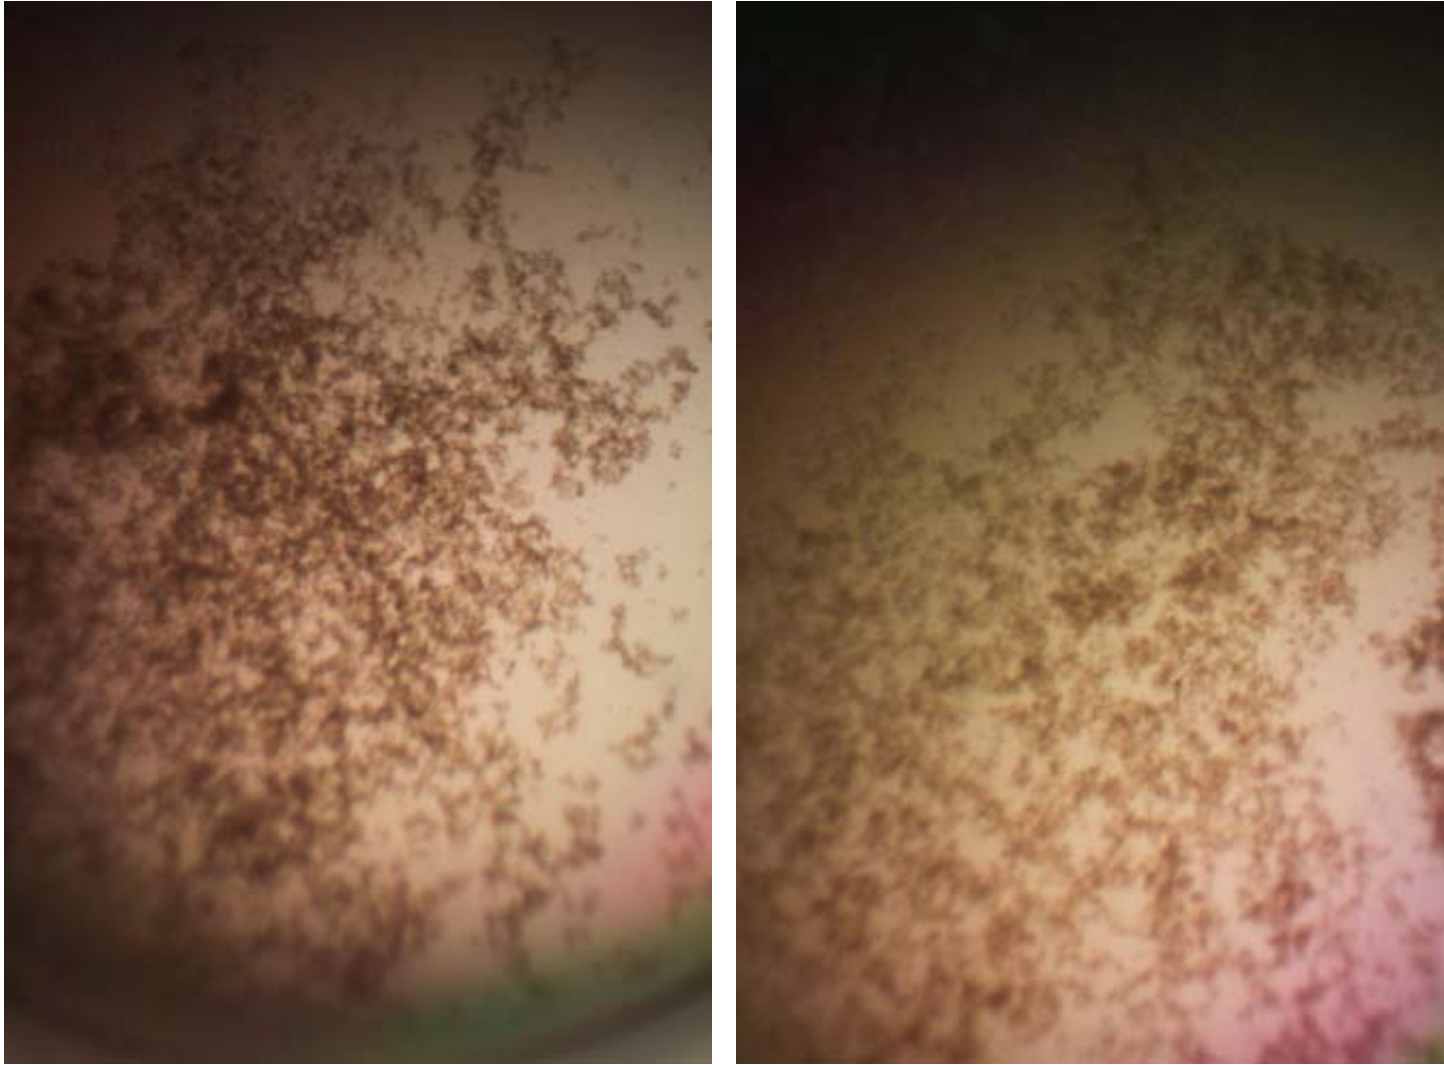

245 Figure 8. Cell clumps photographed at 10x magnification. Left panel: 128  $\mu\text{g}/\text{mL}$  HNP1  
246 at the high inoculum. Right panel: 128  $\mu\text{g}/\text{mL}$  HNP1 + 1:5 RNase at the high inoculum.

247
